# Supplementary material for: Hepatitis C Virus Elimination Using Direct Acting Antivirals after the Radical Cure of Hepatocellular Carcinoma Suppresses the Recurrence of the Cancer
Source: MDPI journal article supplement (doi:10.3390/cancers14092295), 2022-05-04
Supplement: s1 [file s1]

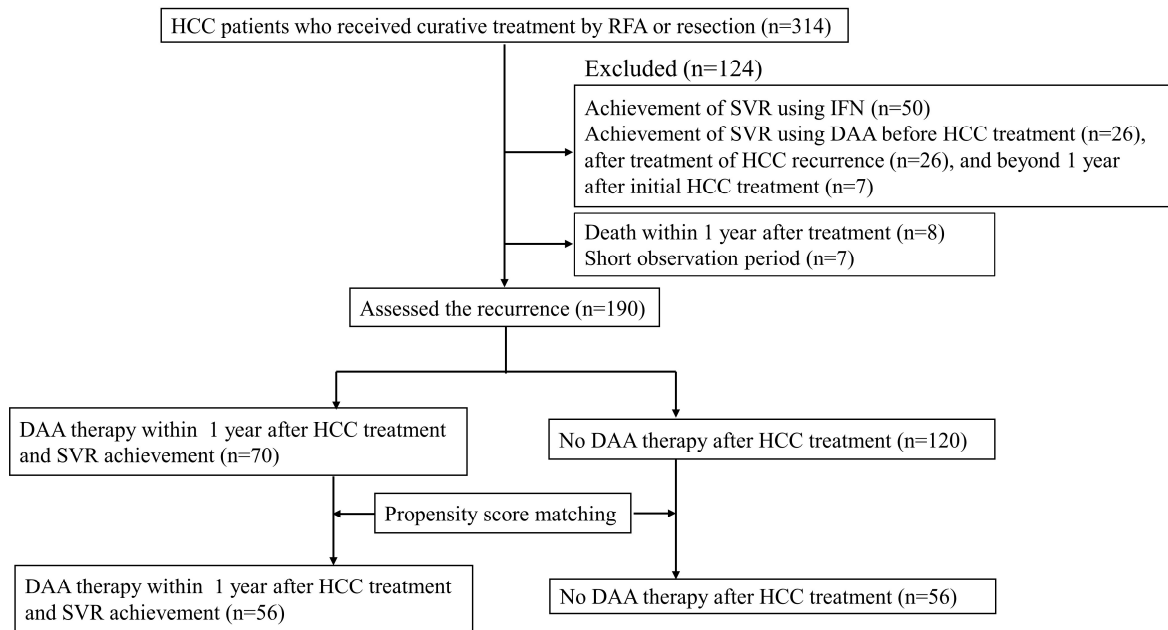

**Supplementary figure S1. Study design.**

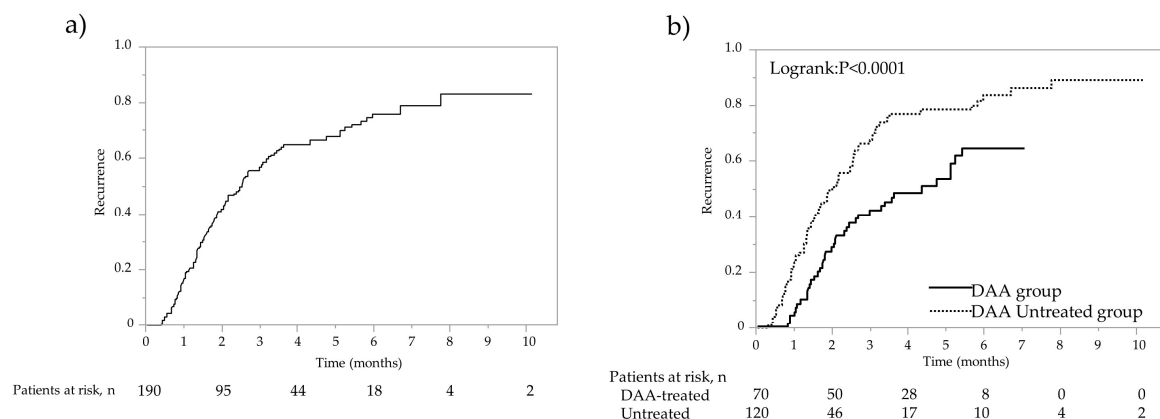

**Supplementary figure S2. Recurrence rate before propensity score matching (PSM) analysis. (a)** Overall recurrence rate of patients after curative treatment for HCC, **(b)** Recurrence rates of patients with and without DAA treatment following HCC curative treatment. Solid line represents DAA therapy group; the dotted line represents DAA untreated group.

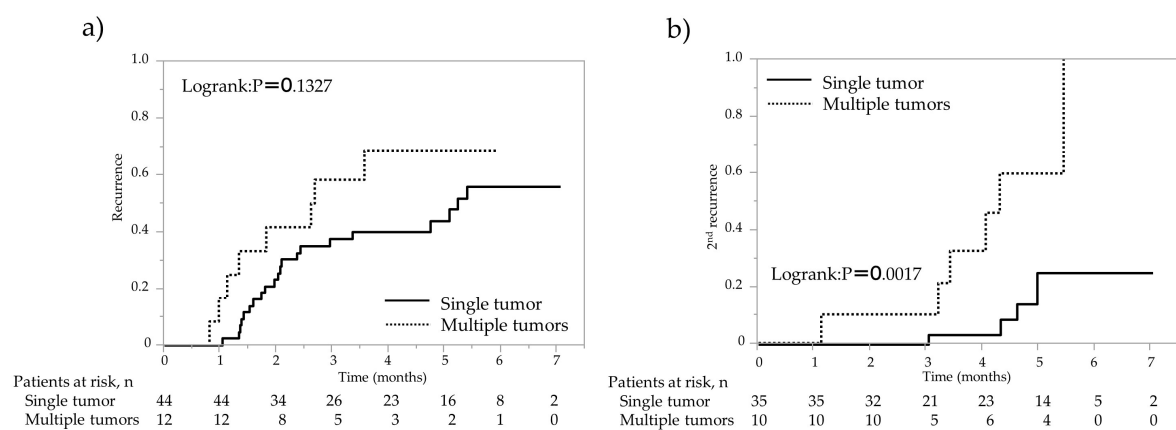

**Supplementary figure S3.** Recurrence and second recurrence rates with and without single tumor following HCC curative treatment in the DAA-treated group after propensity score matching (PSM) analysis. **(a)** Recurrence rate of 56 patients following HCC curative treatment, **(b)** Second recurrence rates of 45 patients with curative treatment for initial and first recurrent HCC.
